# Supplementary material for: Effect of Supplemental Parenteral Nutrition Versus Enteral Nutrition Alone on Clinical Outcomes in Critically Ill Adult Patients: A Systematic Review and Meta-Analysis of Randomized Controlled Trials
Source: MDPI journal article supplement (doi:10.3390/nu12102968), 2020-09-28
Supplement: s1 [file s1]

**Table S1.** Excluded Studies.

| <b>Study</b>                   | <b>Reason for Exclusion</b>                                                                                                       |
|--------------------------------|-----------------------------------------------------------------------------------------------------------------------------------|
| Ridley et al.,2018 [15]        | Not EN alone vs. SPN                                                                                                              |
| Casaer et al., 2011[16]        | The study compared early vs. Late SPN                                                                                             |
| Dunham et al.,1994 [33]        | Low Jadad score                                                                                                                   |
| Abrishami et al., 2010 [34]    | Low Jadad Score                                                                                                                   |
| Allingstrup et al., 2017 [37]  | The study compared the effect of early goal directed nutrition versus standard care and included early and late initiation of SPN |
| Berger et al., 2011 [38]       |                                                                                                                                   |
| Berger et al., 2018 [39]       |                                                                                                                                   |
| Caccialanza et al., 2018 [40]  | Not critically ill patients                                                                                                       |
| Chao et al., 2017 [41]         | Not RCT and not conducted on critically ill or ICU patients                                                                       |
| Deegan et al., 1999 [42]       | Not RCT (retrospective study)                                                                                                     |
| Elke et al., 2008 [43]         | Not RCT (prospective observational study)                                                                                         |
| El-Sayed et al., 2015 [44]     | The study did not assess the effect on clinical outcomes                                                                          |
| Gavri et al., 2016 [45]        | Not RCT (observational study)                                                                                                     |
| Graf et al., 2012 [46]         | Preliminary abstract                                                                                                              |
| Heidegger et al., 2011 [47]    | Preliminary abstract                                                                                                              |
| Heyland et al., 2010 [48]      | Not RCT                                                                                                                           |
| Hsu et al., 2012 [49]          | Not RCT (retrospective study)                                                                                                     |
| Huang et al., 2000 [50]        | Not RCT (nutritional support was based on physician's concerns)                                                                   |
| Kutsogiannis et al., 2011 [51] | Not RCT (observational study)                                                                                                     |
| Lidder et al., 2010 [52]       | Not conducted on critically ill patients                                                                                          |
| Mazaherpur et al., 2016 [53]   | The study did not assess the effect on clinical outcomes                                                                          |
| Nagata et al., 2009 [54]       | Not conducted on critically ill or ICU patients                                                                                   |
| Nataloni et al., 1999 [55]     | The study did not assess the effect on clinical outcomes                                                                          |
| Oertel et al., 2009 [56]       | Not RCT                                                                                                                           |
| Probst et al., 2016 [57]       | Not RCT (retrospective cohort study)                                                                                              |
| Sena et al., 2008 [58]         | Not RCT (retrospective cohort study)                                                                                              |
| Singh et al., 2012 [59]        | Not RCT and not critically ill or ICU patients                                                                                    |
| Theilla et al., 2018 [60]      | Not RCT                                                                                                                           |
| Thibault et al., 2009 [61]     | Preliminary abstract                                                                                                              |
| Thibault et al., 2010 [62]     | Preliminary abstract                                                                                                              |
| Titova et al., 2014 [63]       | Not assessing clinical outcomes                                                                                                   |
| Vallejo et al., 2017 [64]      | Not RCT (retrospective observational study)                                                                                       |
| Qhi et al., 2016 [65]          | Not RCT                                                                                                                           |
| Zhu et al., 2013 [66]          | Not compared to EN alone                                                                                                          |

**Table S1.** Quality assessment of the selected studies by the Jadad Scale.

| <b>Study</b>                 | <b>Randomization</b> | <b>Blinding</b> | <b>An Account of withdrawals and dropouts</b> | <b>Jaded Score</b> |
|------------------------------|----------------------|-----------------|-----------------------------------------------|--------------------|
| Fan et al., 2016 [24]        | 2                    | 0               | 1                                             | 3                  |
| Wischmeyer et al., 2017 [25] | 2                    | 0               | 1                                             | 3                  |
| Bauer et al., 2000 [26]      | 2                    | 1               | 1                                             | 4                  |
| Heidegger et al., 2013 [27]  | 2                    | 0               | 1                                             | 3                  |
| Berger et al., 2018 [28]     | 2                    | 0               | 1                                             | 3                  |
| Dunham et al., 1994 [33]     | 1                    | 0               | 1                                             | 2                  |
| Abrishami et al., 2010 [34]  | 1                    | 0               | 1                                             | 2                  |
